# Supplementary material for: Synthesis and X-ray crystal structure of an anionic heteronuclear metallamacrocyclic triangle
Source: Royal Society of Chemistry journal article supplement (doi:10.1039/b409921d), 2004-01-01
Supplement: b409921d.pdf [file b409921d.pdf]

# Synthesis and X-ray crystal structure of an anionic heteronuclear metallamacrocyclic triangle

José Vicente,<sup>\*</sup> María-Teresa Chicote, Miguel M. Alvarez-Falcón and Peter G. Jones

## Supplementary Information

Experimental details for the preparation of

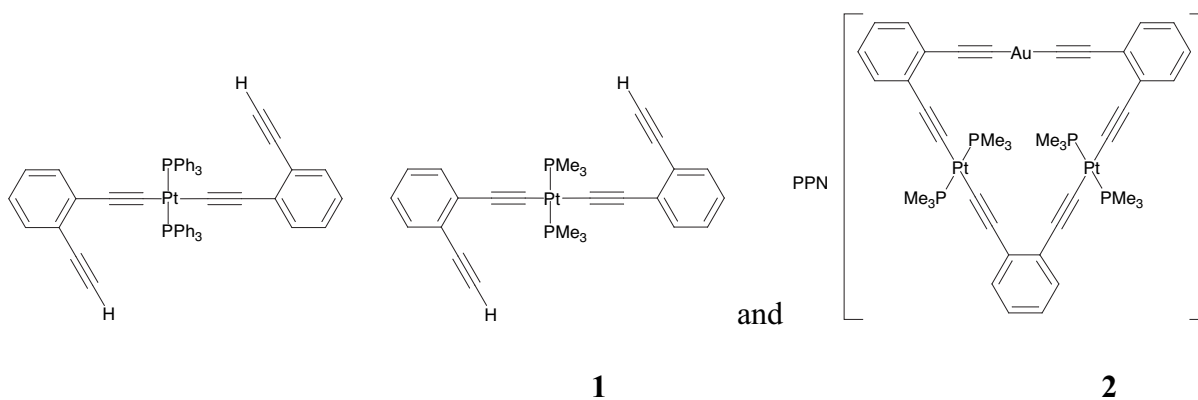

Listing of all refined and calculated atomic coordinates, anisotropic thermal parameters, and bond lengths and angles for **2**.

**[Pt{C≡C(Ar)C≡CH}<sub>2</sub>(PPh<sub>3</sub>)<sub>2</sub>]** (Ar = C<sub>6</sub>Me<sub>4</sub>-1,2,3,4). A mixture of C<sub>6</sub>Me<sub>4</sub>(C≡CH)<sub>2</sub>-1,2 (236 mg, 1.29 mmol) and [PtCl<sub>2</sub>(PPh<sub>3</sub>)<sub>2</sub>] (256 mg, 0.32 mmol) in NHEt<sub>2</sub> (20 mL) in the presence of a catalytic amount of CuI (6 mg, 0.03 mmol), was stirred under N<sub>2</sub> for 15 h, concentrated to dryness and the residue treated with CH<sub>2</sub>Cl<sub>2</sub> (5 mL). The suspension was added dropwise to EtOH (40 mL) and filtered. The colorless solid was dried to give the complex (248 mg, 0.23 mmol, 72% yield). Mp 236 °C (dec). Anal. Calcd. for C<sub>64</sub>H<sub>56</sub>P<sub>2</sub>Pt: C, 71.03; H, 5.22. Found: C, 70.72; H, 5.51. IR (cm<sup>-1</sup>): ν(CH), 3284(s); ν(C≡C), 2102(s). <sup>1</sup>H NMR (400 MHz, CDCl<sub>3</sub>) δ 7.87-7.82 (m, 15 H, PPh<sub>3</sub>), 7.26-7.20 (m, 15 H, PPh<sub>3</sub>), 3.01 (s, 2 H, CH), 2.31 (s, 6 H, Me), 2.07 (s, 6 H, Me), 1.98 (s, 6 H, Me), 1.55 (s, 6 H, Me). <sup>13</sup>C{<sup>1</sup>H} NMR (100 MHz, CDCl<sub>3</sub>) δ 135.3 (m, m-PPh<sub>3</sub>, <sup>3</sup>J<sub>CP</sub> = 5 Hz), 134.7 (Ar), 134.4 (Ar), 134.1 (Ar), 131.5 (m, i-PPh<sub>3</sub>), 130.5 (Ar), 129.8 (m, p-PPh<sub>3</sub>), 129.6 (Ar), 127.5 (m, o-PPh<sub>3</sub>), 120.0 (Ar), 118.6 (CPt, <sup>1</sup>J<sub>PtC</sub> = 31 Hz), 112.4 (CCPt, <sup>2</sup>J<sub>PtC</sub> = 5 Hz), 84.3 (CH), 81.2 (CCH), 18.5 (Me), 17.9 (Me), 16.6 (Me), 16.4 (Me). <sup>31</sup>P{<sup>1</sup>H} NMR (162 MHz, CDCl<sub>3</sub>) δ 17.17 (PPh<sub>3</sub>, <sup>1</sup>J<sub>PPt</sub> = 2671 Hz). MS-FAB<sup>+</sup> (*m/z*, %) 1083 (M<sup>+</sup>, 27%).

**[Pt{C≡C(Ar)C≡CH}<sub>2</sub>(PMe<sub>3</sub>)<sub>2</sub>]** (**1**). To a solution of [Pt{C≡C(Ar)C≡CH}<sub>2</sub>(PPh<sub>3</sub>)<sub>2</sub>] (418 mg, 0.39 mmol) in dry THF (15 mL) was added PMe<sub>3</sub> (1M in toluene, 2.32 mL) under N<sub>2</sub>. The mixture was stirred for 14 h concentrated under vacuum (3 mL) and n-pentane (15 mL) added. After a few minutes, the suspension was filtered and the solid washed with n-pentane (5 mL) and dried under reduced pressure (ca. 1 mbar) to give **1** (243 mg, 0.34 mmol, 88%) as a microcrystalline colourless powder. Mp 234 °C (dec). Anal. Calcd. for C<sub>34</sub>H<sub>44</sub>P<sub>2</sub>Pt: C, 57.54; H, 6.25. Found: C, 57.71; H, 6.67. IR (cm<sup>-1</sup>): ν(CH), 3234(s); ν(C≡C), 2084(s). <sup>1</sup>H NMR (400 MHz, CDCl<sub>3</sub>) δ 3.32 (s, 2 H, CH), 2.48 (s, 6 H, Me), 2.42 (s, 6 H, Me), 2.20 (s, 6 H, Me), 2.17 (s, 6 H, Me), 1.77 (vt, 18 H, Me, PMe<sub>3</sub>, |<sup>2</sup>J<sub>HP</sub> + <sup>4</sup>J<sub>HPt</sub>| = 8 Hz, <sup>3</sup>J<sub>HPt</sub> = 30 Hz). <sup>13</sup>C{<sup>1</sup>H} NMR (100 MHz, CDCl<sub>3</sub>) δ 136.0 (Ar), 135.5 (Ar), 134.7 (Ar), 131.8 (Ar), 129.0 (Ar, <sup>3</sup>J<sub>PtC</sub> = 26 Hz), 120.8 (Ar), 116.0 (CCPt, <sup>2</sup>J<sub>PtC</sub> = 31 Hz), 106.8 (CPt, <sup>1</sup>J<sub>PtC</sub>

= 267 Hz), 84.8 ( $\equiv\text{CH}$ ), 82.4 ( $\text{C}\equiv\text{CH}$ ), 19.0 (Me), 18.6 (Me), 16.9 (Me), 16.5 (Me), 16.0 (vt, Me,  $\text{PMe}_3$ ,  $|^1J_{\text{PC}} + ^3J_{\text{PC}}| = 40$  Hz,  $^2J_{\text{PC}} = 39$  Hz).  $^{31}\text{P}\{^1\text{H}\}$  NMR (162 MHz,  $\text{CDCl}_3$ )  $\delta$  -21.62 ( $\text{PMe}_3$ ,  $^1J_{\text{PP}} = 2320$  Hz). MS-FAB<sup>+</sup> ( $m/z$ , %) 709 ( $\text{M}^+$ , 24%).

**PPN[ $\{\text{Au}\{\text{Pt}(\text{PMe}_3)_2\}_2\}\{\mu^2\text{-Ar}(\text{C}\equiv\text{C})_2\}_3$ ] (**2**).** To a solution of **1** (0.085 g, 0.12 mmol) in degassed  $\text{CH}_2\text{Cl}_2$  (20 mL) was added a solution of PPN[ $\text{Au}(\text{acac})_2$ ] (0.134 g, 0.14 mmol) in the same solvent (5 mL) and the mixture was stirred under  $\text{N}_2$  for 6 h, filtered through Celite and evaporated under vacuum to ca. 5 mL. The slow addition of  $\text{Et}_2\text{O}$  (20 mL) gave a fine orange suspension and a dense dark oil adhered to the flask bottom. The suspension was decanted and  $\text{Et}_2\text{O}$  (10 mL) was added to complete the precipitation of an orange solid which was filtered off and recrystallized from  $\text{CH}_2\text{Cl}_2$  and  $\text{Et}_2\text{O}$  to give **2** (65 mg, 0.033 mmol, 55%) as a microcrystalline bright orange powder. Crystals of **2**· $\text{H}_2\text{O}$ , suitable for an X ray diffraction study were obtained by slow diffusion of  $\text{Et}_2\text{O}$  into a solution of **2** in  $\text{CH}_2\text{Cl}_2$ . Mp 142 °C (dec). Anal. Calcd. for  $\text{C}_{90}\text{H}_{102}\text{AuNP}_6\text{Pt}_2$ : C, 54.85; H, 5.22; N, 0.71. Found: C, 55.10; H, 5.06; N, 1.06. IR ( $\text{cm}^{-1}$ ):  $\nu(\text{C}\equiv\text{C})$ , 2086(s).  $^1\text{H}$  NMR (200 MHz,  $\text{CDCl}_3$ )  $\delta$  7.73-7.26 (m, 30 H, PPN), 2.49 (s, 6 H, Me), 2.44 (s, 6 H, Me), 2.39 (s, 6 H, Me), 2.15 (s, 6 H, Me), 2.11 (s, 6 H, Me), 2.05 (s, 6 H, Me), 1.83 (vt, 36 H, Me,  $\text{PMe}_3$ ,  $|^2J_{\text{HP}} + ^4J_{\text{HP}}| = 8$  Hz,  $^3J_{\text{HPt}} = 30$  Hz).  $^{13}\text{C}\{^1\text{H}\}$  NMR (50 MHz,  $\text{CDCl}_3$ )  $\delta$  142.50, 135.49, 134.89, 134.73, 134.09 (m, p-PPN), 133.82, 133.17, 131.97 (m, m-PPN), 130.81, 130.42, 130.16, 129.70 (m, o-PPN), 126.8 (dd, i-PPN,  $^1J_{\text{CP}} = 108$  Hz,  $^3J_{\text{CP}} = 2$  Hz), 123.57, 117.49, 115.26, 108.67 ( $\text{C}\equiv\text{C}$ ), 107.95 ( $\text{C}\equiv\text{C}$ ), 102.03 (CPt,  $^1J_{\text{CP}} = 25$  Hz), 19.27 (Me), 19.15 (Me), 19.08 (Me), 16.87 (Me), 16.68 (Me), 16.65 (Me), 16.41 (vt, Me,  $\text{PMe}_3$ ,  $|^1J_{\text{PC}} + ^3J_{\text{PC}}| = 62$  Hz).  $^{31}\text{P}\{^1\text{H}\}$  NMR (81MHz,  $\text{CDCl}_3$ )  $\delta$  21.82 (s, PPN), -21.47 ( $\text{PMe}_3$ ,  $^1J_{\text{PP}} = 2323$  Hz).  $\Lambda_{\text{M}}$  ( $\Omega^{-1}\cdot\text{cm}^2\cdot\text{mol}^{-1}$ ) 88. MS-FAB<sup>-</sup> ( $m/z$ , %) 1431 ( $\text{M}^-$ , 30%).

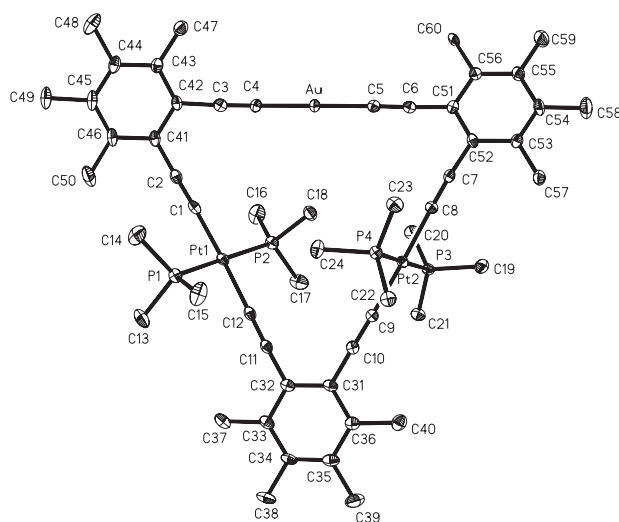

Table 1. Crystal data and structure refinement.

|                                   |                                                                        |                             |
|-----------------------------------|------------------------------------------------------------------------|-----------------------------|
| Identification code               | mura                                                                   |                             |
| Empirical formula                 | C <sub>90</sub> H <sub>104</sub> Au N O P <sub>6</sub> Pt <sub>2</sub> |                             |
| Formula weight                    | 1988.71                                                                |                             |
| Temperature                       | 133(2) K                                                               |                             |
| Wavelength                        | 0.71073 Å                                                              |                             |
| Crystal system                    | Triclinic                                                              |                             |
| Space group                       | P -1                                                                   |                             |
| Unit cell dimensions              | a = 13.444(2) Å                                                        | $\alpha = 118.064(6)^\circ$ |
|                                   | b = 18.759(3) Å                                                        | $\beta = 92.078(6)^\circ$   |
|                                   | c = 18.827(3) Å                                                        | $\gamma = 91.734(6)^\circ$  |
| Volume                            | 4181.2(11) Å <sup>3</sup>                                              |                             |
| Z                                 | 2                                                                      |                             |
| Density (calculated)              | 1.580 Mg/m <sup>3</sup>                                                |                             |
| Absorption coefficient            | 5.248 mm <sup>-1</sup>                                                 |                             |
| F(000)                            | 1968                                                                   |                             |
| Crystal size                      | 0.24 x 0.14 x 0.07 mm <sup>3</sup>                                     |                             |
| Theta range for data collection   | 1.23 to 28.28°                                                         |                             |
| Index ranges                      | -17 ≤ h ≤ 17, -25 ≤ k ≤ 25, -25 ≤ l ≤ 25                               |                             |
| Reflections collected             | 68098                                                                  |                             |
| Independent reflections           | 20677 [R(int) = 0.1069]                                                |                             |
| Completeness to theta = 28.25°    | 99.6 %                                                                 |                             |
| Absorption correction             | Semi-empirical from equivalents                                        |                             |
| Max. and min. transmission        | 0.802 and 0.587                                                        |                             |
| Refinement method                 | Full-matrix least-squares on F <sup>2</sup>                            |                             |
| Data / restraints / parameters    | 20677 / 246 / 912                                                      |                             |
| Goodness-of-fit on F <sup>2</sup> | 0.956                                                                  |                             |
| Final R indices [I > 2σ(I)]       | R1 = 0.0452, wR2 = 0.0911                                              |                             |
| R indices (all data)              | R1 = 0.0868, wR2 = 0.1094                                              |                             |
| Largest diff. peak and hole       | 3.492 and -3.393 e.Å <sup>-3</sup>                                     |                             |

Table 2. Atomic coordinates ( $\times 10^4$ ) and equivalent isotropic displacement parameters ( $\text{\AA}^2 \times 10^3$ ).  $U(\text{eq})$  is defined as one third of the trace of the orthogonalized  $U_{ij}$  tensor.

|       | x           | y          | z          | $U(\text{eq})$ |
|-------|-------------|------------|------------|----------------|
| Au    | 7236.9(2)   | 4648.9(1)  | 3183.5(1)  | 25.5(1)        |
| Pt(1) | 8789.2(2)   | 7848.1(1)  | 5939.7(1)  | 25.0(1)        |
| Pt(2) | 7703.6(2)   | 5213.1(1)  | 6716.5(1)  | 22.6(1)        |
| P(1)  | 10386.3(12) | 8391.6(10) | 6225.9(10) | 29.1(4)        |
| P(2)  | 7244.0(12)  | 7194.0(10) | 5662.7(10) | 30.5(4)        |
| P(3)  | 6014.8(12)  | 5205.4(10) | 6817.3(9)  | 26.0(3)        |
| P(4)  | 9390.9(12)  | 5193.9(10) | 6608.8(9)  | 26.2(3)        |
| C(1)  | 8829(5)     | 7634(4)    | 4799(4)    | 28.0(13)       |
| C(2)  | 8896(5)     | 7521(4)    | 4112(4)    | 30.0(13)       |
| C(3)  | 8148(5)     | 6011(4)    | 2817(3)    | 28.5(13)       |
| C(4)  | 7702(4)     | 5519(4)    | 2937(3)    | 26.0(13)       |
| C(5)  | 6870(4)     | 3770(4)    | 3456(3)    | 26.8(13)       |
| C(6)  | 6678(4)     | 3255(4)    | 3638(3)    | 26.1(12)       |
| C(7)  | 7083(4)     | 3488(4)    | 5238(3)    | 25.0(12)       |
| C(8)  | 7413(4)     | 4119(4)    | 5794(3)    | 25.4(12)       |
| C(9)  | 7931(4)     | 6344(4)    | 7621(3)    | 24.4(12)       |
| C(10) | 8078(4)     | 7033(4)    | 8154(3)    | 25.9(12)       |
| C(11) | 8642(4)     | 8296(4)    | 7807(4)    | 27.7(13)       |
| C(12) | 8728(5)     | 8119(4)    | 7106(4)    | 28.7(13)       |
| C(13) | 10455(6)    | 9476(4)    | 6879(5)    | 51(2)          |
| C(14) | 11125(5)    | 8287(6)    | 5404(4)    | 53(2)          |
| C(15) | 11161(6)    | 8010(6)    | 6760(5)    | 55(2)          |
| C(16) | 6447(6)     | 7253(6)    | 4897(5)    | 58(2)          |
| C(17) | 6460(5)     | 7449(5)    | 6495(4)    | 51(2)          |
| C(18) | 7369(5)     | 6128(4)    | 5292(4)    | 40.2(16)       |
| C(19) | 5506(5)     | 4386(4)    | 6959(4)    | 42.6(17)       |
| C(20) | 5328(5)     | 5090(4)    | 5924(4)    | 36.8(16)       |
| C(21) | 5514(5)     | 6072(4)    | 7629(3)    | 33.7(15)       |
| C(22) | 10074(5)    | 5437(4)    | 7551(3)    | 31.5(14)       |
| C(23) | 9866(5)     | 4248(4)    | 5893(4)    | 37.3(16)       |
| C(24) | 9876(5)     | 5937(4)    | 6334(4)    | 39.7(17)       |

|       |            |            |           |          |
|-------|------------|------------|-----------|----------|
| C(31) | 8235(4)    | 7847(4)    | 8794(3)   | 26.9(12) |
| C(32) | 8502(4)    | 8482(4)    | 8629(3)   | 27.4(12) |
| C(33) | 8604(4)    | 9284(4)    | 9258(4)   | 32.0(13) |
| C(34) | 8445(5)    | 9436(4)    | 10044(3)  | 32.0(14) |
| C(35) | 8204(5)    | 8811(4)    | 10217(3)  | 34.9(14) |
| C(36) | 8086(4)    | 8012(4)    | 9595(3)   | 29.8(13) |
| C(37) | 8828(6)    | 9961(4)    | 9067(4)   | 43.0(17) |
| C(38) | 8502(6)    | 10315(4)   | 10708(4)  | 48.7(19) |
| C(39) | 8017(7)    | 8988(5)    | 11075(4)  | 56(2)    |
| C(40) | 7750(5)    | 7323(5)    | 9750(4)   | 41.8(17) |
| C(41) | 9050(4)    | 7337(4)    | 3281(4)   | 31.4(13) |
| C(42) | 8733(4)    | 6573(4)    | 2646(3)   | 27.6(12) |
| C(43) | 8964(4)    | 6353(4)    | 1849(4)   | 30.5(13) |
| C(44) | 9478(5)    | 6924(4)    | 1700(4)   | 36.0(14) |
| C(45) | 9749(5)    | 7707(5)    | 2327(4)   | 42.2(16) |
| C(46) | 9549(5)    | 7907(4)    | 3118(4)   | 37.6(15) |
| C(47) | 8678(6)    | 5528(5)    | 1195(4)   | 44.3(17) |
| C(48) | 9774(6)    | 6692(6)    | 849(5)    | 62(2)    |
| C(49) | 10305(6)   | 8301(5)    | 2136(5)   | 56(2)    |
| C(50) | 9833(7)    | 8738(5)    | 3797(5)   | 62(2)    |
| C(51) | 6420(4)    | 2615(4)    | 3824(3)   | 25.4(12) |
| C(52) | 6636(4)    | 2733(4)    | 4615(3)   | 25.6(12) |
| C(53) | 6365(4)    | 2101(4)    | 4804(3)   | 28.8(13) |
| C(54) | 5921(5)    | 1369(4)    | 4205(4)   | 35.0(14) |
| C(55) | 5739(5)    | 1253(4)    | 3415(4)   | 33.9(14) |
| C(56) | 5995(5)    | 1876(4)    | 3226(3)   | 28.6(13) |
| C(57) | 6579(6)    | 2222(4)    | 5639(4)   | 39.5(16) |
| C(58) | 5643(7)    | 712(5)     | 4419(5)   | 65(3)    |
| C(59) | 5271(7)    | 472(5)     | 2773(4)   | 58(2)    |
| C(60) | 5792(5)    | 1766(4)    | 2392(3)   | 36.6(16) |
| P(5)  | 6391.8(12) | 2429.3(10) | 9917.1(9) | 24.8(3)  |
| P(6)  | 6538.2(12) | 2113.3(10) | 8193.2(9) | 24.4(3)  |
| N     | 6665(4)    | 2093(3)    | 9019(3)   | 28.4(11) |
| C(61) | 5891(4)    | 3416(4)    | 10361(3)  | 26.3(13) |
| C(62) | 4950(5)    | 3477(4)    | 10052(3)  | 31.7(14) |
| C(63) | 4568(5)    | 4237(4)    | 10341(4)  | 37.5(16) |

|        |         |          |          |          |
|--------|---------|----------|----------|----------|
| C(64)  | 5095(5) | 4918(4)  | 10930(4) | 37.7(15) |
| C(65)  | 6015(5) | 4853(4)  | 11237(4) | 37.0(15) |
| C(66)  | 6414(5) | 4104(4)  | 10951(3) | 30.6(14) |
| C(71)  | 7487(4) | 2462(4)  | 10504(3) | 25.7(13) |
| C(72)  | 8395(5) | 2264(4)  | 10145(4) | 31.9(14) |
| C(73)  | 9228(5) | 2270(4)  | 10601(4) | 37.8(16) |
| C(74)  | 9179(5) | 2472(4)  | 11399(3) | 32.5(14) |
| C(75)  | 8274(4) | 2668(4)  | 11758(3) | 29.1(13) |
| C(76)  | 7440(5) | 2668(4)  | 11314(3) | 27.6(13) |
| C(81)  | 5458(4) | 1768(4)  | 10004(3) | 27.0(13) |
| C(82)  | 4880(4) | 2052(4)  | 10670(4) | 31.0(14) |
| C(83)  | 4187(5) | 1547(5)  | 10747(4) | 38.3(15) |
| C(84)  | 4045(5) | 761(5)   | 10155(4) | 44.7(17) |
| C(85)  | 4609(6) | 463(5)   | 9487(4)  | 45.0(17) |
| C(86)  | 5317(5) | 969(4)   | 9407(4)  | 35.6(15) |
| C(91)  | 7268(4) | 2926(4)  | 8179(3)  | 28.3(13) |
| C(92)  | 7203(5) | 3706(4)  | 8824(4)  | 36.9(15) |
| C(93)  | 7658(5) | 4357(4)  | 8804(4)  | 44.2(17) |
| C(94)  | 8186(5) | 4261(4)  | 8155(4)  | 43.3(17) |
| C(95)  | 8285(6) | 3489(4)  | 7520(4)  | 45.3(18) |
| C(96)  | 7824(5) | 2826(4)  | 7530(4)  | 38.0(16) |
| C(101) | 5275(5) | 2222(3)  | 7910(3)  | 28.6(13) |
| C(102) | 4513(5) | 1752(4)  | 7984(4)  | 40.0(16) |
| C(103) | 3545(6) | 1795(5)  | 7747(5)  | 66(3)    |
| C(104) | 3326(7) | 2317(6)  | 7444(7)  | 85(3)    |
| C(105) | 4071(6) | 2790(5)  | 7381(6)  | 67(3)    |
| C(106) | 5035(5) | 2746(5)  | 7607(4)  | 46.5(18) |
| C(111) | 6905(4) | 1154(4)  | 7421(3)  | 26.0(13) |
| C(112) | 6699(5) | 917(4)   | 6617(3)  | 33.2(15) |
| C(113) | 6984(6) | 184(4)   | 6030(4)  | 44.2(18) |
| C(114) | 7497(5) | -313(4)  | 6249(4)  | 42.1(17) |
| C(115) | 7687(5) | -94(4)   | 7051(4)  | 41.6(17) |
| C(116) | 7408(5) | 640(4)   | 7635(4)  | 32.4(14) |
| O(1)   | 6088(9) | -1273(8) | 4108(7)  | 192(5)   |

---

Table 3. Bond lengths [ $\text{\AA}$ ] and angles [ $^\circ$ ].

|             |            |             |           |
|-------------|------------|-------------|-----------|
| Au-C(4)     | 1.987(6)   | C(31)-C(32) | 1.406(8)  |
| Au-C(5)     | 1.997(6)   | C(31)-C(36) | 1.412(7)  |
| Pt(1)-C(1)  | 1.994(6)   | C(32)-C(33) | 1.409(8)  |
| Pt(1)-C(12) | 2.013(6)   | C(33)-C(34) | 1.395(7)  |
| Pt(1)-P(1)  | 2.2819(18) | C(33)-C(37) | 1.500(9)  |
| Pt(1)-P(2)  | 2.2932(18) | C(34)-C(35) | 1.388(8)  |
| Pt(2)-C(8)  | 1.982(6)   | C(34)-C(38) | 1.527(9)  |
| Pt(2)-C(9)  | 2.005(6)   | C(35)-C(36) | 1.402(8)  |
| Pt(2)-P(4)  | 2.2847(17) | C(35)-C(39) | 1.520(8)  |
| Pt(2)-P(3)  | 2.2854(17) | C(36)-C(40) | 1.515(9)  |
| P(1)-C(14)  | 1.805(7)   | C(41)-C(46) | 1.404(8)  |
| P(1)-C(15)  | 1.805(7)   | C(41)-C(42) | 1.406(8)  |
| P(1)-C(13)  | 1.812(7)   | C(42)-C(43) | 1.405(7)  |
| P(2)-C(18)  | 1.797(7)   | C(43)-C(44) | 1.400(8)  |
| P(2)-C(17)  | 1.801(7)   | C(43)-C(47) | 1.482(9)  |
| P(2)-C(16)  | 1.813(7)   | C(44)-C(45) | 1.411(9)  |
| P(3)-C(21)  | 1.799(6)   | C(44)-C(48) | 1.521(9)  |
| P(3)-C(19)  | 1.800(7)   | C(45)-C(46) | 1.392(9)  |
| P(3)-C(20)  | 1.805(6)   | C(45)-C(49) | 1.508(9)  |
| P(4)-C(23)  | 1.803(6)   | C(46)-C(50) | 1.505(10) |
| P(4)-C(24)  | 1.813(6)   | C(51)-C(56) | 1.397(8)  |
| P(4)-C(22)  | 1.814(6)   | C(51)-C(52) | 1.417(7)  |
| C(1)-C(2)   | 1.215(8)   | C(52)-C(53) | 1.430(8)  |
| C(2)-C(41)  | 1.459(8)   | C(53)-C(54) | 1.399(8)  |
| C(3)-C(4)   | 1.196(9)   | C(53)-C(57) | 1.495(8)  |
| C(3)-C(42)  | 1.457(9)   | C(54)-C(55) | 1.409(8)  |
| C(5)-C(6)   | 1.192(8)   | C(54)-C(58) | 1.508(9)  |
| C(6)-C(51)  | 1.437(8)   | C(55)-C(56) | 1.408(8)  |
| C(7)-C(8)   | 1.210(8)   | C(55)-C(59) | 1.493(10) |
| C(7)-C(52)  | 1.442(8)   | C(56)-C(60) | 1.498(8)  |
| C(9)-C(10)  | 1.210(8)   | P(5)-N      | 1.564(5)  |
| C(10)-C(31) | 1.435(8)   | P(5)-C(71)  | 1.790(6)  |
| C(11)-C(12) | 1.210(8)   | P(5)-C(61)  | 1.800(6)  |
| C(11)-C(32) | 1.439(8)   | P(5)-C(81)  | 1.804(7)  |



|                  |           |                  |           |
|------------------|-----------|------------------|-----------|
| P(6)-N           | 1.577(5)  | C(84)-C(85)      | 1.380(9)  |
| P(6)-C(91)       | 1.800(7)  | C(85)-C(86)      | 1.385(9)  |
| P(6)-C(111)      | 1.800(6)  | C(91)-C(96)      | 1.394(7)  |
| P(6)-C(101)      | 1.807(6)  | C(91)-C(92)      | 1.403(8)  |
| C(61)-C(66)      | 1.390(8)  | C(92)-C(93)      | 1.367(9)  |
| C(61)-C(62)      | 1.404(7)  | C(93)-C(94)      | 1.375(8)  |
| C(62)-C(63)      | 1.387(8)  | C(94)-C(95)      | 1.392(9)  |
| C(63)-C(64)      | 1.385(9)  | C(95)-C(96)      | 1.382(9)  |
| C(64)-C(65)      | 1.379(8)  | C(101)-C(102)    | 1.384(8)  |
| C(65)-C(66)      | 1.382(8)  | C(101)-C(106)    | 1.390(8)  |
| C(71)-C(72)      | 1.392(7)  | C(102)-C(103)    | 1.378(9)  |
| C(71)-C(76)      | 1.391(7)  | C(103)-C(104)    | 1.379(10) |
| C(72)-C(73)      | 1.384(8)  | C(104)-C(105)    | 1.362(10) |
| C(73)-C(74)      | 1.369(8)  | C(105)-C(106)    | 1.366(9)  |
| C(74)-C(75)      | 1.387(8)  | C(111)-C(112)    | 1.376(7)  |
| C(75)-C(76)      | 1.375(7)  | C(111)-C(116)    | 1.391(7)  |
| C(81)-C(82)      | 1.387(7)  | C(112)-C(113)    | 1.376(8)  |
| C(81)-C(86)      | 1.389(8)  | C(113)-C(114)    | 1.377(8)  |
| C(82)-C(83)      | 1.367(9)  | C(114)-C(115)    | 1.376(8)  |
| C(83)-C(84)      | 1.369(9)  | C(115)-C(116)    | 1.373(8)  |
|                  |           |                  |           |
| C(4)-Au-C(5)     | 175.9(2)  | C(13)-P(1)-Pt(1) | 112.7(3)  |
| C(1)-Pt(1)-C(12) | 177.2(2)  | C(18)-P(2)-C(17) | 102.5(4)  |
| C(1)-Pt(1)-P(1)  | 91.65(19) | C(18)-P(2)-C(16) | 104.2(4)  |
| C(12)-Pt(1)-P(1) | 88.24(19) | C(17)-P(2)-C(16) | 104.4(4)  |
| C(1)-Pt(1)-P(2)  | 90.24(19) | C(18)-P(2)-Pt(1) | 110.0(2)  |
| C(12)-Pt(1)-P(2) | 90.13(19) | C(17)-P(2)-Pt(1) | 117.3(3)  |
| P(1)-Pt(1)-P(2)  | 174.27(6) | C(16)-P(2)-Pt(1) | 116.8(3)  |
| C(8)-Pt(2)-C(9)  | 176.5(2)  | C(21)-P(3)-C(19) | 102.2(3)  |
| C(8)-Pt(2)-P(4)  | 95.14(17) | C(21)-P(3)-C(20) | 104.4(3)  |
| C(9)-Pt(2)-P(4)  | 87.27(17) | C(19)-P(3)-C(20) | 103.4(3)  |
| C(8)-Pt(2)-P(3)  | 83.94(17) | C(21)-P(3)-Pt(2) | 117.5(2)  |
| C(9)-Pt(2)-P(3)  | 93.68(17) | C(19)-P(3)-Pt(2) | 114.2(2)  |
| P(4)-Pt(2)-P(3)  | 178.85(6) | C(20)-P(3)-Pt(2) | 113.4(2)  |
| C(14)-P(1)-C(15) | 103.5(3)  | C(23)-P(4)-C(24) | 105.2(3)  |
| C(14)-P(1)-C(13) | 102.6(4)  | C(23)-P(4)-C(22) | 104.1(3)  |
| C(15)-P(1)-C(13) | 103.9(4)  | C(24)-P(4)-C(22) | 104.2(3)  |
| C(14)-P(1)-Pt(1) | 118.6(3)  | C(23)-P(4)-Pt(2) | 116.4(2)  |
| C(15)-P(1)-Pt(1) | 113.8(3)  | C(24)-P(4)-Pt(2) | 112.9(2)  |

|                   |          |                   |          |
|-------------------|----------|-------------------|----------|
| C(22)-P(4)-Pt(2)  | 112.9(2) | C(42)-C(43)-C(47) | 119.9(5) |
| C(2)-C(1)-Pt(1)   | 177.0(6) | C(43)-C(44)-C(45) | 121.2(6) |
| C(1)-C(2)-C(41)   | 174.7(6) | C(43)-C(44)-C(48) | 119.5(6) |
| C(4)-C(3)-C(42)   | 176.6(6) | C(45)-C(44)-C(48) | 119.2(6) |
| C(3)-C(4)-Au      | 168.3(5) | C(46)-C(45)-C(44) | 119.7(6) |
| C(6)-C(5)-Au      | 177.8(6) | C(46)-C(45)-C(49) | 120.9(7) |
| C(5)-C(6)-C(51)   | 177.5(7) | C(44)-C(45)-C(49) | 119.2(7) |
| C(8)-C(7)-C(52)   | 175.6(6) | C(45)-C(46)-C(41) | 119.8(6) |
| C(7)-C(8)-Pt(2)   | 169.8(5) | C(45)-C(46)-C(50) | 120.7(6) |
| C(10)-C(9)-Pt(2)  | 178.4(5) | C(41)-C(46)-C(50) | 119.5(6) |
| C(9)-C(10)-C(31)  | 178.8(7) | C(56)-C(51)-C(52) | 120.4(5) |
| C(12)-C(11)-C(32) | 177.4(7) | C(56)-C(51)-C(6)  | 120.5(5) |
| C(11)-C(12)-Pt(1) | 176.6(5) | C(52)-C(51)-C(6)  | 119.0(5) |
| C(32)-C(31)-C(36) | 119.9(6) | C(51)-C(52)-C(53) | 119.1(5) |
| C(32)-C(31)-C(10) | 120.8(5) | C(51)-C(52)-C(7)  | 121.2(5) |
| C(36)-C(31)-C(10) | 119.3(5) | C(53)-C(52)-C(7)  | 119.7(5) |
| C(31)-C(32)-C(33) | 120.1(5) | C(54)-C(53)-C(52) | 120.0(5) |
| C(31)-C(32)-C(11) | 118.6(5) | C(54)-C(53)-C(57) | 120.4(5) |
| C(33)-C(32)-C(11) | 121.2(6) | C(52)-C(53)-C(57) | 119.5(6) |
| C(34)-C(33)-C(32) | 119.1(6) | C(53)-C(54)-C(55) | 120.1(6) |
| C(34)-C(33)-C(37) | 121.2(6) | C(53)-C(54)-C(58) | 119.0(6) |
| C(32)-C(33)-C(37) | 119.6(6) | C(55)-C(54)-C(58) | 120.9(6) |
| C(35)-C(34)-C(33) | 121.3(6) | C(56)-C(55)-C(54) | 120.2(6) |
| C(35)-C(34)-C(38) | 120.6(6) | C(56)-C(55)-C(59) | 119.5(6) |
| C(33)-C(34)-C(38) | 118.0(6) | C(54)-C(55)-C(59) | 120.3(6) |
| C(34)-C(35)-C(36) | 120.1(5) | C(51)-C(56)-C(55) | 120.2(5) |
| C(34)-C(35)-C(39) | 120.6(6) | C(51)-C(56)-C(60) | 119.0(5) |
| C(36)-C(35)-C(39) | 119.2(6) | C(55)-C(56)-C(60) | 120.8(6) |
| C(35)-C(36)-C(31) | 119.5(6) | N-P(5)-C(71)      | 108.4(3) |
| C(35)-C(36)-C(40) | 121.7(5) | N-P(5)-C(61)      | 115.1(3) |
| C(31)-C(36)-C(40) | 118.7(6) | C(71)-P(5)-C(61)  | 108.8(3) |
| C(46)-C(41)-C(42) | 120.1(6) | N-P(5)-C(81)      | 110.4(3) |
| C(46)-C(41)-C(2)  | 120.2(6) | C(71)-P(5)-C(81)  | 108.1(3) |
| C(42)-C(41)-C(2)  | 119.7(5) | C(61)-P(5)-C(81)  | 105.8(3) |
| C(43)-C(42)-C(41) | 120.7(5) | N-P(6)-C(91)      | 113.0(3) |
| C(43)-C(42)-C(3)  | 119.8(6) | N-P(6)-C(111)     | 107.0(2) |
| C(41)-C(42)-C(3)  | 119.5(5) | C(91)-P(6)-C(111) | 110.2(3) |
| C(44)-C(43)-C(42) | 118.4(6) | N-P(6)-C(101)     | 114.7(3) |
| C(44)-C(43)-C(47) | 121.7(6) | C(91)-P(6)-C(101) | 105.5(3) |

|                    |          |                      |          |
|--------------------|----------|----------------------|----------|
| C(111)-P(6)-C(101) | 106.4(3) | C(85)-C(86)-C(81)    | 119.7(6) |
| P(5)-N-P(6)        | 149.2(3) | C(96)-C(91)-C(92)    | 119.0(6) |
| C(66)-C(61)-C(62)  | 120.3(5) | C(96)-C(91)-P(6)     | 123.0(5) |
| C(66)-C(61)-P(5)   | 122.9(4) | C(92)-C(91)-P(6)     | 117.8(5) |
| C(62)-C(61)-P(5)   | 116.7(4) | C(93)-C(92)-C(91)    | 120.2(6) |
| C(63)-C(62)-C(61)  | 118.4(6) | C(92)-C(93)-C(94)    | 120.9(6) |
| C(64)-C(63)-C(62)  | 120.9(6) | C(93)-C(94)-C(95)    | 119.8(7) |
| C(65)-C(64)-C(63)  | 120.4(6) | C(96)-C(95)-C(94)    | 119.9(6) |
| C(64)-C(65)-C(66)  | 119.7(6) | C(95)-C(96)-C(91)    | 120.2(6) |
| C(65)-C(66)-C(61)  | 120.3(6) | C(102)-C(101)-C(106) | 118.3(6) |
| C(72)-C(71)-C(76)  | 119.3(5) | C(102)-C(101)-P(6)   | 118.8(4) |
| C(72)-C(71)-P(5)   | 119.9(4) | C(106)-C(101)-P(6)   | 122.9(5) |
| C(76)-C(71)-P(5)   | 120.8(4) | C(103)-C(102)-C(101) | 120.6(6) |
| C(73)-C(72)-C(71)  | 119.1(5) | C(102)-C(103)-C(104) | 120.0(8) |
| C(74)-C(73)-C(72)  | 121.4(6) | C(105)-C(104)-C(103) | 119.7(8) |
| C(73)-C(74)-C(75)  | 119.6(6) | C(104)-C(105)-C(106) | 120.7(7) |
| C(76)-C(75)-C(74)  | 119.7(5) | C(105)-C(106)-C(101) | 120.6(7) |
| C(75)-C(76)-C(71)  | 120.8(5) | C(112)-C(111)-C(116) | 119.1(6) |
| C(82)-C(81)-C(86)  | 119.5(6) | C(112)-C(111)-P(6)   | 121.2(4) |
| C(82)-C(81)-P(5)   | 120.3(5) | C(116)-C(111)-P(6)   | 119.8(4) |
| C(86)-C(81)-P(5)   | 120.2(5) | C(111)-C(112)-C(113) | 120.8(6) |
| C(83)-C(82)-C(81)  | 120.5(6) | C(114)-C(113)-C(112) | 119.6(6) |
| C(82)-C(83)-C(84)  | 119.9(6) | C(115)-C(114)-C(113) | 120.3(6) |
| C(83)-C(84)-C(85)  | 120.8(7) | C(116)-C(115)-C(114) | 120.0(6) |
| C(84)-C(85)-C(86)  | 119.6(7) | C(115)-C(116)-C(111) | 120.2(6) |

---

Symmetry transformations used to generate equivalent atoms:

Table 4. Anisotropic displacement parameters ( $\text{\AA}^2 \times 10^3$ ). The anisotropic displacement factor exponent takes the form:  $-2\pi^2 [ h^2 a^{*2} U^{11} + \dots + 2 h k a^* b^* U^{12} ]$

|       | U <sup>11</sup> | U <sup>22</sup> | U <sup>33</sup> | U <sup>23</sup> | U <sup>13</sup> | U <sup>12</sup> |
|-------|-----------------|-----------------|-----------------|-----------------|-----------------|-----------------|
| Au    | 25.5(1)         | 25.4(1)         | 29.0(1)         | 15.9(1)         | 0.6(1)          | -0.6(1)         |
| Pt(1) | 21.8(1)         | 20.7(1)         | 28.9(1)         | 8.8(1)          | 0.3(1)          | 2.1(1)          |
| Pt(2) | 21.2(1)         | 21.1(1)         | 24.1(1)         | 9.7(1)          | -1.6(1)         | 0.2(1)          |
| P(1)  | 23.8(9)         | 28.6(9)         | 34.9(8)         | 15.1(7)         | 0.8(7)          | 2.6(7)          |
| P(2)  | 24.1(9)         | 31.0(9)         | 33.6(8)         | 13.1(7)         | 0.2(7)          | 1.9(7)          |
| P(3)  | 23.7(8)         | 27.2(9)         | 24.3(7)         | 9.9(6)          | -0.3(6)         | 0.4(7)          |
| P(4)  | 22.4(8)         | 25.0(8)         | 30.3(8)         | 12.3(7)         | 0.9(7)          | 1.4(7)          |
| C(1)  | 24(3)           | 19(3)           | 37(3)           | 10(3)           | -5(3)           | 0(3)            |
| C(2)  | 24(3)           | 27(3)           | 39(3)           | 16(3)           | -2(3)           | -1(3)           |
| C(3)  | 25(3)           | 31(3)           | 30(3)           | 14(3)           | -5(3)           | 4(3)            |
| C(4)  | 21(3)           | 31(3)           | 30(3)           | 18(3)           | 1(3)            | 1(3)            |
| C(5)  | 20(3)           | 29(3)           | 29(3)           | 12(3)           | 4(3)            | 4(3)            |
| C(6)  | 23(3)           | 27(3)           | 26(3)           | 11(2)           | -2(2)           | 3(3)            |
| C(7)  | 20(3)           | 31(3)           | 28(3)           | 18(2)           | 1(2)            | 0(2)            |
| C(8)  | 23(3)           | 25(3)           | 27(3)           | 11(2)           | 2(2)            | 3(2)            |
| C(9)  | 20(3)           | 27(3)           | 27(3)           | 13(2)           | 1(2)            | 2(3)            |
| C(10) | 20(3)           | 28(3)           | 31(3)           | 15(2)           | -1(3)           | 2(3)            |
| C(11) | 18(3)           | 26(3)           | 35(3)           | 11(3)           | 2(3)            | -3(3)           |
| C(12) | 26(3)           | 21(3)           | 37(3)           | 12(3)           | 3(3)            | 3(3)            |
| C(13) | 39(5)           | 31(4)           | 71(5)           | 13(4)           | 5(4)            | -8(3)           |
| C(14) | 23(4)           | 86(7)           | 56(5)           | 38(5)           | 4(4)            | -6(4)           |
| C(15) | 32(4)           | 82(7)           | 81(6)           | 62(5)           | 6(4)            | 12(4)           |
| C(16) | 32(4)           | 83(7)           | 70(5)           | 48(5)           | -14(4)          | -8(4)           |
| C(17) | 27(4)           | 57(5)           | 51(4)           | 9(4)            | 5(3)            | 0(4)            |
| C(18) | 43(4)           | 30(4)           | 44(4)           | 14(3)           | 5(3)            | -1(3)           |
| C(19) | 45(5)           | 46(5)           | 37(3)           | 20(3)           | 8(3)            | -4(4)           |
| C(20) | 31(4)           | 44(4)           | 36(3)           | 20(3)           | -9(3)           | 0(3)            |
| C(21) | 30(4)           | 32(4)           | 33(3)           | 10(3)           | 0(3)            | 3(3)            |
| C(22) | 22(3)           | 37(4)           | 35(3)           | 17(3)           | 2(3)            | 5(3)            |
| C(23) | 26(4)           | 38(4)           | 44(4)           | 14(3)           | 10(3)           | 8(3)            |
| C(24) | 34(4)           | 46(4)           | 52(4)           | 33(4)           | 8(3)            | 4(3)            |
| C(31) | 15(3)           | 31(3)           | 26(3)           | 7(2)            | -5(2)           | -1(3)           |
| C(32) | 18(3)           | 29(3)           | 29(3)           | 8(2)            | -1(2)           | 3(3)            |
| C(33) | 21(3)           | 29(3)           | 36(3)           | 8(2)            | -2(3)           | -1(3)           |

|       |         |         |         |         |         |        |
|-------|---------|---------|---------|---------|---------|--------|
| C(34) | 24(3)   | 30(3)   | 26(3)   | 1(2)    | -6(3)   | -1(3)  |
| C(35) | 23(3)   | 45(4)   | 27(3)   | 10(3)   | -6(3)   | 1(3)   |
| C(36) | 20(3)   | 36(3)   | 31(3)   | 14(2)   | -5(3)   | 1(3)   |
| C(37) | 45(5)   | 27(3)   | 46(4)   | 9(3)    | -7(3)   | -3(3)  |
| C(38) | 48(5)   | 40(4)   | 31(3)   | -5(3)   | -6(3)   | -4(4)  |
| C(39) | 72(6)   | 61(6)   | 30(3)   | 17(3)   | 5(4)    | 9(5)   |
| C(40) | 39(4)   | 51(4)   | 43(4)   | 28(3)   | -1(3)   | 2(3)   |
| C(41) | 32(4)   | 28(3)   | 45(3)   | 26(3)   | -1(3)   | 3(3)   |
| C(42) | 22(3)   | 27(3)   | 38(3)   | 20(2)   | -2(3)   | -1(3)  |
| C(43) | 22(3)   | 36(3)   | 38(3)   | 22(3)   | 1(3)    | 1(3)   |
| C(44) | 27(4)   | 50(4)   | 48(3)   | 37(3)   | 0(3)    | 1(3)   |
| C(45) | 29(4)   | 49(4)   | 70(4)   | 47(3)   | -2(3)   | -6(3)  |
| C(46) | 33(4)   | 36(4)   | 57(4)   | 34(3)   | -1(3)   | -6(3)  |
| C(47) | 46(5)   | 52(4)   | 35(3)   | 22(3)   | 0(3)    | -9(4)  |
| C(48) | 51(5)   | 101(7)  | 61(4)   | 61(5)   | 12(4)   | 9(5)   |
| C(49) | 53(5)   | 57(5)   | 86(6)   | 56(5)   | 5(5)    | -9(4)  |
| C(50) | 73(6)   | 41(4)   | 79(5)   | 35(4)   | -15(5)  | -21(4) |
| C(51) | 20(3)   | 31(3)   | 30(3)   | 18(2)   | 1(2)    | 2(2)   |
| C(52) | 16(3)   | 25(3)   | 37(3)   | 15(2)   | 1(2)    | -2(2)  |
| C(53) | 23(3)   | 34(3)   | 33(3)   | 19(3)   | 3(3)    | -1(3)  |
| C(54) | 33(4)   | 29(3)   | 47(3)   | 23(3)   | -7(3)   | -11(3) |
| C(55) | 32(4)   | 32(3)   | 36(3)   | 15(3)   | -4(3)   | -8(3)  |
| C(56) | 28(3)   | 30(3)   | 28(3)   | 14(2)   | 1(3)    | 2(3)   |
| C(57) | 54(5)   | 32(4)   | 37(3)   | 21(3)   | -5(3)   | -6(3)  |
| C(58) | 85(7)   | 54(5)   | 70(5)   | 45(5)   | -25(5)  | -30(5) |
| C(59) | 79(6)   | 42(4)   | 47(4)   | 19(3)   | -11(4)  | -20(4) |
| C(60) | 50(4)   | 21(3)   | 29(3)   | 6(3)    | -10(3)  | -21(3) |
| P(5)  | 24.0(8) | 28.2(9) | 26.1(7) | 16.1(7) | -0.2(6) | 3.4(7) |
| P(6)  | 26.0(8) | 26.5(8) | 26.4(7) | 17.1(6) | 0.4(6)  | 4.1(7) |
| C(61) | 28(3)   | 27(3)   | 31(3)   | 19(2)   | 1(3)    | 5(3)   |
| C(62) | 32(4)   | 31(3)   | 33(3)   | 16(3)   | 0(3)    | 3(3)   |
| C(63) | 32(4)   | 44(4)   | 42(4)   | 24(3)   | -2(3)   | 13(3)  |
| C(64) | 49(4)   | 32(3)   | 39(3)   | 22(3)   | 10(3)   | 13(3)  |
| C(65) | 46(4)   | 31(3)   | 37(3)   | 19(3)   | 2(3)    | 4(3)   |
| C(66) | 36(4)   | 31(3)   | 31(3)   | 19(3)   | -1(3)   | 3(3)   |
| C(71) | 25(3)   | 27(3)   | 29(3)   | 16(3)   | -3(2)   | 1(3)   |
| C(72) | 31(4)   | 34(4)   | 30(3)   | 15(3)   | 2(3)    | 2(3)   |
| C(73) | 23(3)   | 44(4)   | 44(3)   | 18(3)   | 6(3)    | 8(3)   |
| C(74) | 24(3)   | 30(4)   | 38(3)   | 12(3)   | -9(3)   | 1(3)   |

|        |       |       |         |       |        |        |
|--------|-------|-------|---------|-------|--------|--------|
| C(75)  | 27(3) | 31(3) | 30(3)   | 15(3) | -3(2)  | 4(3)   |
| C(76)  | 27(3) | 30(3) | 29(3)   | 16(3) | 4(3)   | 7(3)   |
| C(81)  | 25(3) | 30(3) | 30(3)   | 18(3) | -5(2)  | 4(3)   |
| C(82)  | 24(3) | 39(4) | 33(3)   | 21(3) | -1(3)  | 4(3)   |
| C(83)  | 24(4) | 56(4) | 49(4)   | 36(3) | 2(3)   | 7(3)   |
| C(84)  | 27(4) | 60(5) | 64(4)   | 46(4) | -14(3) | -11(3) |
| C(85)  | 55(5) | 37(4) | 46(4)   | 25(3) | -18(3) | -11(3) |
| C(86)  | 46(4) | 31(3) | 35(3)   | 20(3) | -6(3)  | 0(3)   |
| C(91)  | 28(3) | 29(3) | 32(3)   | 18(3) | -1(3)  | 2(3)   |
| C(92)  | 44(4) | 30(4) | 39(3)   | 18(3) | 9(3)   | 2(3)   |
| C(93)  | 50(5) | 28(4) | 47(4)   | 11(3) | 3(3)   | -1(3)  |
| C(94)  | 43(4) | 41(4) | 58(4)   | 34(3) | 0(4)   | -8(3)  |
| C(95)  | 53(5) | 45(4) | 43(4)   | 25(3) | 8(4)   | -9(4)  |
| C(96)  | 42(4) | 38(4) | 37(3)   | 20(3) | 4(3)   | -5(3)  |
| C(101) | 26(3) | 26(3) | 34(3)   | 15(3) | -2(3)  | 2(3)   |
| C(102) | 37(4) | 40(4) | 51(4)   | 28(3) | 1(3)   | 2(3)   |
| C(103) | 30(4) | 76(7) | 112(7)  | 61(6) | -5(5)  | -8(4)  |
| C(104) | 42(5) | 99(9) | 154(10) | 92(8) | -8(6)  | 8(5)   |
| C(105) | 49(5) | 58(6) | 119(7)  | 64(6) | -15(5) | 9(4)   |
| C(106) | 43(4) | 49(5) | 65(5)   | 42(4) | -2(4)  | 8(4)   |
| C(111) | 23(3) | 27(3) | 31(3)   | 17(3) | -1(3)  | 0(3)   |
| C(112) | 43(4) | 30(3) | 32(3)   | 19(3) | -1(3)  | 2(3)   |
| C(113) | 66(5) | 28(4) | 36(3)   | 15(3) | -6(3)  | -3(4)  |
| C(114) | 49(5) | 22(3) | 47(3)   | 10(3) | 2(3)   | 6(3)   |
| C(115) | 37(4) | 39(4) | 49(4)   | 21(3) | -6(3)  | 11(3)  |
| C(116) | 35(4) | 25(3) | 43(3)   | 21(3) | -5(3)  | 4(3)   |

---

Table 5. Hydrogen coordinates ( $\times 10^4$ ) and isotropic displacement parameters ( $\text{\AA}^2 \times 10^3$ ).

|        | x     | y    | z    | U(eq) |
|--------|-------|------|------|-------|
| H(13A) | 10064 | 9603 | 7349 | 62    |
| H(13B) | 10186 | 9746 | 6583 | 62    |
| H(13C) | 11151 | 9665 | 7057 | 62    |
| H(14A) | 10759 | 8481 | 5074 | 64    |
| H(14B) | 11261 | 7717 | 5071 | 64    |
| H(14C) | 11756 | 8608 | 5620 | 64    |
| H(15A) | 10815 | 8040 | 7222 | 67    |
| H(15B) | 11790 | 8336 | 6951 | 67    |
| H(15C) | 11297 | 7445 | 6398 | 67    |
| H(16A) | 6339  | 7822 | 5055 | 69    |
| H(16B) | 5805  | 6965 | 4841 | 69    |
| H(16C) | 6766  | 7005 | 4381 | 69    |
| H(17A) | 6346  | 8029 | 6751 | 62    |
| H(17B) | 6787  | 7319 | 6891 | 62    |
| H(17C) | 5820  | 7139 | 6298 | 62    |
| H(18A) | 7789  | 5921 | 4829 | 48    |
| H(18B) | 6709  | 5846 | 5125 | 48    |
| H(18C) | 7677  | 6035 | 5719 | 48    |
| H(19A) | 5835  | 4399 | 7438 | 51    |
| H(19B) | 5615  | 3870 | 6485 | 51    |
| H(19C) | 4789  | 4442 | 7031 | 51    |
| H(20A) | 5557  | 5515 | 5796 | 44    |
| H(20B) | 4616  | 5133 | 6020 | 44    |
| H(20C) | 5439  | 4559 | 5472 | 44    |
| H(21A) | 5751  | 6564 | 7614 | 40    |
| H(21B) | 5735  | 6103 | 8145 | 40    |
| H(21C) | 4785  | 6022 | 7570 | 40    |
| H(22A) | 9860  | 5949 | 7977 | 38    |
| H(22B) | 10789 | 5486 | 7489 | 38    |
| H(22C) | 9942  | 5005 | 7694 | 38    |
| H(23A) | 9532  | 4071 | 5361 | 45    |
| H(23B) | 9740  | 3839 | 6067 | 45    |
| H(23C) | 10585 | 4322 | 5862 | 45    |
| H(24A) | 9642  | 6470 | 6701 | 48    |

|        |       |       |       |    |
|--------|-------|-------|-------|----|
| H(24B) | 9642  | 5786  | 5779  | 48 |
| H(24C) | 10606 | 5958  | 6372  | 48 |
| H(37A) | 8244  | 10287 | 9158  | 65 |
| H(37B) | 8994  | 9737  | 8502  | 65 |
| H(37C) | 9394  | 10303 | 9417  | 65 |
| H(38A) | 8447  | 10331 | 11233 | 73 |
| H(38B) | 7955  | 10601 | 10616 | 73 |
| H(38C) | 9141  | 10577 | 10701 | 73 |
| H(39A) | 7388  | 9256  | 11233 | 84 |
| H(39B) | 8564  | 9343  | 11441 | 84 |
| H(39C) | 7979  | 8480  | 11104 | 84 |
| H(40A) | 8030  | 7419  | 10278 | 63 |
| H(40B) | 7982  | 6814  | 9330  | 63 |
| H(40C) | 7020  | 7289  | 9744  | 63 |
| H(47A) | 8157  | 5557  | 834   | 67 |
| H(47B) | 8426  | 5193  | 1429  | 67 |
| H(47C) | 9262  | 5286  | 891   | 67 |
| H(48A) | 10443 | 6485  | 776   | 92 |
| H(48B) | 9771  | 7169  | 764   | 92 |
| H(48C) | 9297  | 6273  | 459   | 92 |
| H(49A) | 10570 | 8764  | 2639  | 85 |
| H(49B) | 9850  | 8488  | 1848  | 85 |
| H(49C) | 10856 | 8036  | 1798  | 85 |
| H(50A) | 10552 | 8783  | 3930  | 94 |
| H(50B) | 9470  | 8827  | 4272  | 94 |
| H(50C) | 9662  | 9145  | 3633  | 94 |
| H(57A) | 5950  | 2219  | 5885  | 59 |
| H(57B) | 6949  | 2742  | 5962  | 59 |
| H(57C) | 6978  | 1784  | 5617  | 59 |
| H(58A) | 6194  | 350   | 4309  | 97 |
| H(58B) | 5045  | 402   | 4095  | 97 |
| H(58C) | 5511  | 956   | 4992  | 97 |
| H(59A) | 4746  | 581   | 2468  | 87 |
| H(59B) | 4981  | 163   | 3021  | 87 |
| H(59C) | 5778  | 158   | 2408  | 87 |
| H(60A) | 5786  | 2297  | 2411  | 55 |
| H(60B) | 5143  | 1476  | 2174  | 55 |
| H(60C) | 6314  | 1453  | 2046  | 55 |
| H(62)  | 4583  | 3009  | 9654  | 38 |



|        |      |      |       |     |
|--------|------|------|-------|-----|
| H(63)  | 3937 | 4290 | 10132 | 45  |
| H(64)  | 4820 | 5433 | 11124 | 45  |
| H(65)  | 6373 | 5321 | 11642 | 44  |
| H(66)  | 7050 | 4058 | 11159 | 37  |
| H(72)  | 8442 | 2127 | 9594  | 38  |
| H(73)  | 9847 | 2130 | 10356 | 45  |
| H(74)  | 9761 | 2479 | 11704 | 39  |
| H(75)  | 8232 | 2801 | 12309 | 35  |
| H(76)  | 6823 | 2810 | 11564 | 33  |
| H(82)  | 4967 | 2600 | 11075 | 37  |
| H(83)  | 3805 | 1742 | 11210 | 46  |
| H(84)  | 3551 | 417  | 10205 | 54  |
| H(85)  | 4513 | -86  | 9085  | 54  |
| H(86)  | 5703 | 770  | 8946  | 43  |
| H(92)  | 6842 | 3782 | 9277  | 44  |
| H(93)  | 7609 | 4883 | 9243  | 53  |
| H(94)  | 8481 | 4720 | 8140  | 52  |
| H(95)  | 8670 | 3418 | 7080  | 54  |
| H(96)  | 7886 | 2300 | 7094  | 46  |
| H(102) | 4659 | 1397 | 8199  | 48  |
| H(103) | 3028 | 1465 | 7793  | 79  |
| H(104) | 2659 | 2346 | 7279  | 103 |
| H(105) | 3918 | 3154 | 7178  | 80  |
| H(106) | 5546 | 3078 | 7557  | 56  |
| H(112) | 6355 | 1264 | 6466  | 40  |
| H(113) | 6828 | 21   | 5477  | 53  |
| H(114) | 7720 | -809 | 5846  | 50  |
| H(115) | 8012 | -451 | 7199  | 50  |
| H(116) | 7558 | 798  | 8188  | 39  |

---
